# Supplementary material for: A superconducting boron allotrope featuring anticlinal pentapyramids
Source: Royal Society of Chemistry journal article supplement (doi:10.1039/d1tc03908c), 2021-11-25
Supplement: d1tc03908c1.pdf [file d1tc03908c1.pdf]

## Supplemental Material

### A superconducting boron allotrope featuring anticlinal pentapyramids

Zhi Cui<sup>1†</sup>, Qiuping Yang<sup>1,2†</sup>, Xin Qu<sup>3†</sup>, Xiaohua Zhang<sup>1,2</sup>, Yong Liu<sup>1</sup>, and Guochun Yang<sup>1,2,3,\*</sup>

<sup>1</sup>State Key Laboratory of Metastable Materials Science & Technology and Key Laboratory for Microstructural Material Physics of Hebei Province, School of Science, Yanshan University, Qinhuangdao 066004, China

<sup>2</sup>Centre for Advanced Optoelectronic Functional Materials Research and Key Laboratory for UV Light-Emitting Materials and Technology of Northeast Normal University, Changchun 130024, China

<sup>3</sup>Key Laboratory of Functional Materials Physics and Chemistry of the Ministry of Education, Key Laboratory of Preparation and Application of Environmental Friendly Materials, College of Physics, Jilin Normal University, Changchun 130103, China

\*Corresponding Author Email: yanggc468@nenu.edu.cn

| Index                                                                                                                                                | Page |
|------------------------------------------------------------------------------------------------------------------------------------------------------|------|
| 1. Computational details                                                                                                                             | 3    |
| 2. Calculated Birch-Murnaghan equation of states for <i>Immm</i> SrB <sub>2</sub>                                                                    | 5    |
| 3. Phase stabilities of the Sr-B compounds at difference pressures                                                                                   | 6    |
| 4. Phonon dispersion curves for the predicted stable Sr-B compounds                                                                                  | 7    |
| 5. The description of electronic structures of the Sr-B compounds                                                                                    | 8    |
| 6. The electronic band structures of the predicted stable Sr-B compounds                                                                             | 9    |
| 7. The projected density of states (PDOS) of the predicted Sr-B compounds                                                                            | 10   |
| 8. The formation enthalpies of <i>Immm</i> -SrB <sub>8</sub> compounds with respect to Sr and <i>o</i> -B <sub>16</sub> as functions of pressure     | 11   |
| 9. Electron localization function of the predicted stable Sr-B system                                                                                | 12   |
| 10. COHP for SrB <sub>8</sub> at 150 GPa and <i>o</i> -B <sub>16</sub> at 1 atm                                                                      | 13   |
| 11. Enthalpies are shown relative to $\alpha$ -Ga-type                                                                                               | 14   |
| 12. Eliashberg spectral function $\alpha^2F(\omega)$ and frequency-dependent electron-phonon coupling parameters $\lambda(\omega)$ of Sr-B compounds | 15   |
| 13. Free energy as a function of molecular dynamics (MD) time at temperatures of 300 and 1000 K for <i>o</i> -B <sub>16</sub>                        | 16   |
| 14. The <i>o</i> -B <sub>16</sub> fermi surface associated with each band crossing the Fermi level                                                   | 17   |

|                                                                                                                                                                             |    |
|-----------------------------------------------------------------------------------------------------------------------------------------------------------------------------|----|
| 15. Phonon density of states (PHDOS) of <i>Immm</i> SrB <sub>8</sub> .....                                                                                                  | 18 |
| 16. The crystal structural information of Sr-B compounds.....                                                                                                               | 19 |
| 17. Elastic stiffness constants C <sub>ij</sub> for <i>o</i> -B <sub>16</sub> .....                                                                                         | 20 |
| 18. Bader atomic charge of the predicted stable SrB <sub>8</sub> phase.....                                                                                                 | 21 |
| 19. Total energy of <i>o</i> -B <sub>16</sub> per atom in comparison with those of <i>α</i> -B <sub>12</sub> , <i>γ</i> -B <sub>28</sub> , and <i>α</i> -Ga-type boron..... | 21 |
| 20. References.....                                                                                                                                                         | 22 |

## Computational Details

The structure search approach is based on a global minimization of free energy surfaces merging *ab initio* total-energy calculations as implemented in the CALYPSO code<sup>1, 2</sup>. We have performed extensive structure searches on the Sr-B system with various SrB<sub>x</sub> ( $x = 1-8$ ) chemical compositions at 0 K and selected pressures of 1 atm, 25, 50, 100, 150, and 200 GPa. Here, the cell size is up to four formula units for SrB<sub>x</sub> ( $x = 1-4$ ) stoichiometries, and two formula units for the other compositions. In the first step, random symmetric structures are constructed in which atomic coordinates are generated by the crystallographic symmetry operations. Local optimizations using the VASP code<sup>3</sup> are performed with the conjugate gradient method, and are deemed to be converged when the enthalpy changes become smaller than  $1 \times 10^{-5}$  eV per cell. The cut-off energy for the expansion of wavefunctions into plane waves is set to 370 eV and a Monkhorst–Pack  $k$ -mesh with a maximum spacing of  $2\pi \times 0.06 \text{ \AA}^{-1}$  was used in all structure searches. After the first generation of structures is optimized 60% of the lowest lying structures are selected to construct the next generation by PSO (Particle Swarm Optimization). 40% of the structures in the new generation are randomly generated. A structure fingerprinting technique using a bond characterization matrix is applied to the generated structures, so that identical structures are strictly forbidden. This procedure significantly enhances the diversity of the structures, which is crucial for maintaining the efficiency of the global search. In most cases, structure search simulations for each calculation are stopped after generating 1000 ~ 1200 structures (e.g., about 20 ~ 30 generations).

In order to further test the reliability of the adopted pseudopotentials for Sr and B, the validity of the projector augmented wave pseudopotentials from the VASP library are checked by comparing the calculated Birch-Murnaghan equation of state with those obtained using the full-potential linearized augmented plane-wave method (LAPW, as implemented in WIEN2k), which employs local orbitals<sup>4</sup>. The Birch-Murnaghan equation of states derived from PAW and LAPW methods are almost identical. Thus, our adopted pseudopotentials are reliable in the range of 0 – 200 GPa.

The electron-phonon coupling calculations are carried out with the density functional perturbation (linear response) theory as implemented in the QUANTUM ESPRESSO package<sup>5</sup>. We employ ultrasoft pseudopotentials with  $4s^24p^65s^2$  and  $2s^22p^1$  as valence electrons for Sr, and B atoms, respectively. To reliably calculate the electron-phonon coupling in metallic systems, we need to sample dense  $k$ -meshes for the electronic Brillouin zone integration and enough  $q$ -points for evaluating the average contributions from the phonon modes: we use a  $k$ -grid with a spacing of  $2\pi \times 0.03 \text{ \AA}^{-1}$ . We have calculated the superconducting  $T_c$  of Sr as estimated from the McMillan-Allen-Dynes formula<sup>6-8</sup>:

$$T_c = \frac{\omega_{\log}}{1.2} \exp\left[-\frac{1.04(1+\lambda)}{\lambda - \mu^*(1+0.62\lambda)}\right] \quad (1)$$

where  $\mu^*$ , the Coulomb pseudopotential, was assumed to be 0.1. The electron-phonon coupling constant,  $\lambda$ , and the logarithmic average phonon frequency,  $\omega_{\log}$ , are calculated from the Eliashberg spectral function for the electron-phonon interaction:

$$\alpha^2 F(\omega) = \frac{1}{N(E_F)} \sum_{kq,v} |g_{k,k+q,v}|^2 \delta(\varepsilon_k) \delta(\varepsilon_{k+q}) \delta(\omega - \omega_{q,v}) \quad (2)$$

where  $\lambda = 2 \int d\omega \frac{\alpha^2 F(\omega)}{\omega}$ ;  $\omega_{\log} = \exp\left[\frac{2}{\lambda} \int \frac{d\omega}{\omega} \alpha^2 F(\omega) \ln(\omega)\right]$ . Herein,  $N(E_F)$  is the electronic density of states at the Fermi level,  $\omega_{q,v}$  is the phonon frequency of mode  $v$  and wave vector  $q$ , and  $|g_{k,k+q,v}|$  is the electron-phonon matrix element between two electronic states with momenta  $k$  and  $k+q$  at the Fermi level<sup>9</sup>.

## Supplemental Figures

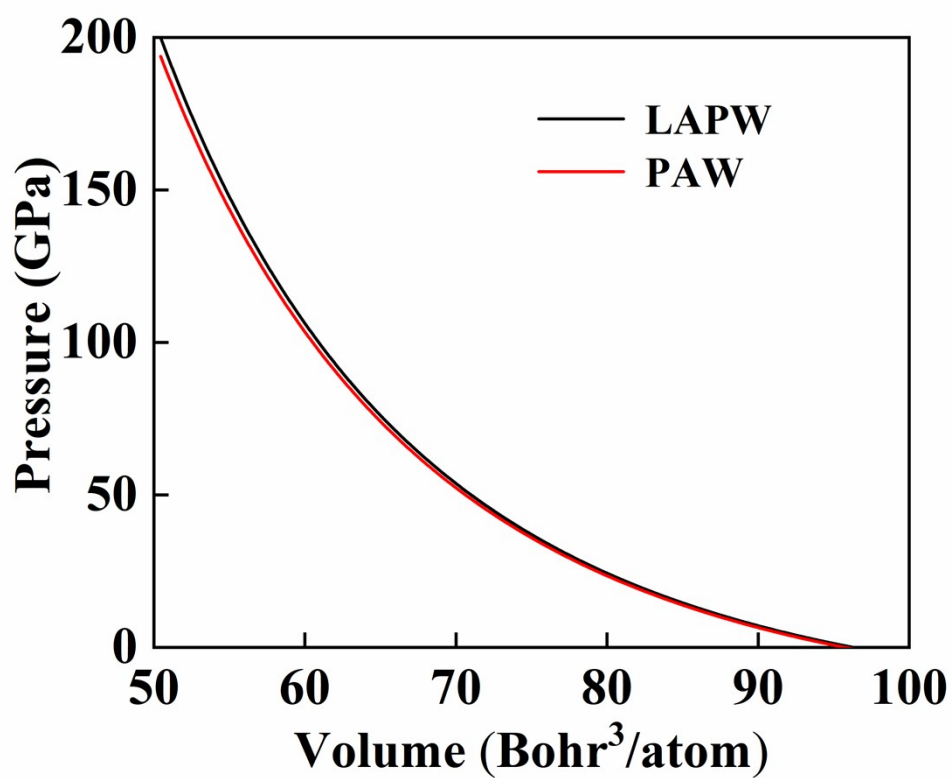

**Fig. S0.** Comparison of the fitted Birch-Murnaghan equation of states for SrB<sub>2</sub> with *Immm* symmetry by using the results calculated using the PAW pseudopotentials and the full-potential LAPW method.

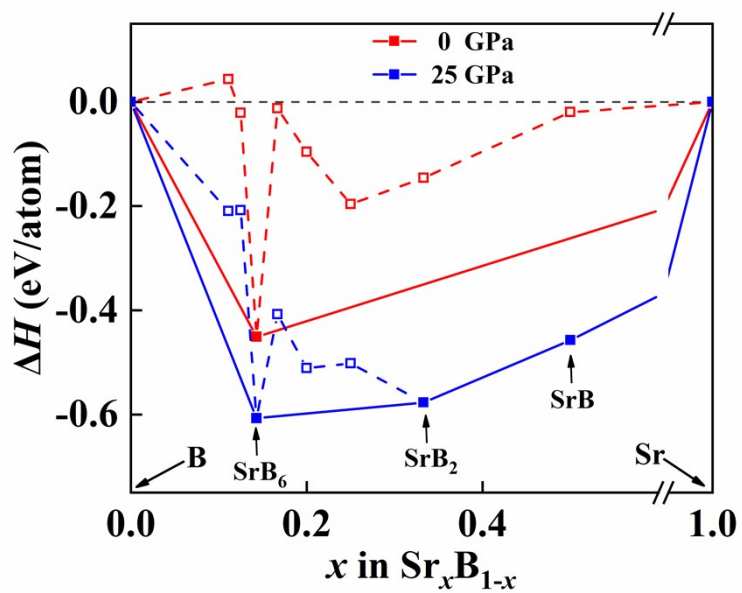

**Fig. S1.** Phase stabilities of the Sr-B compounds with respect to elemental Sr and B solids at different pressures.

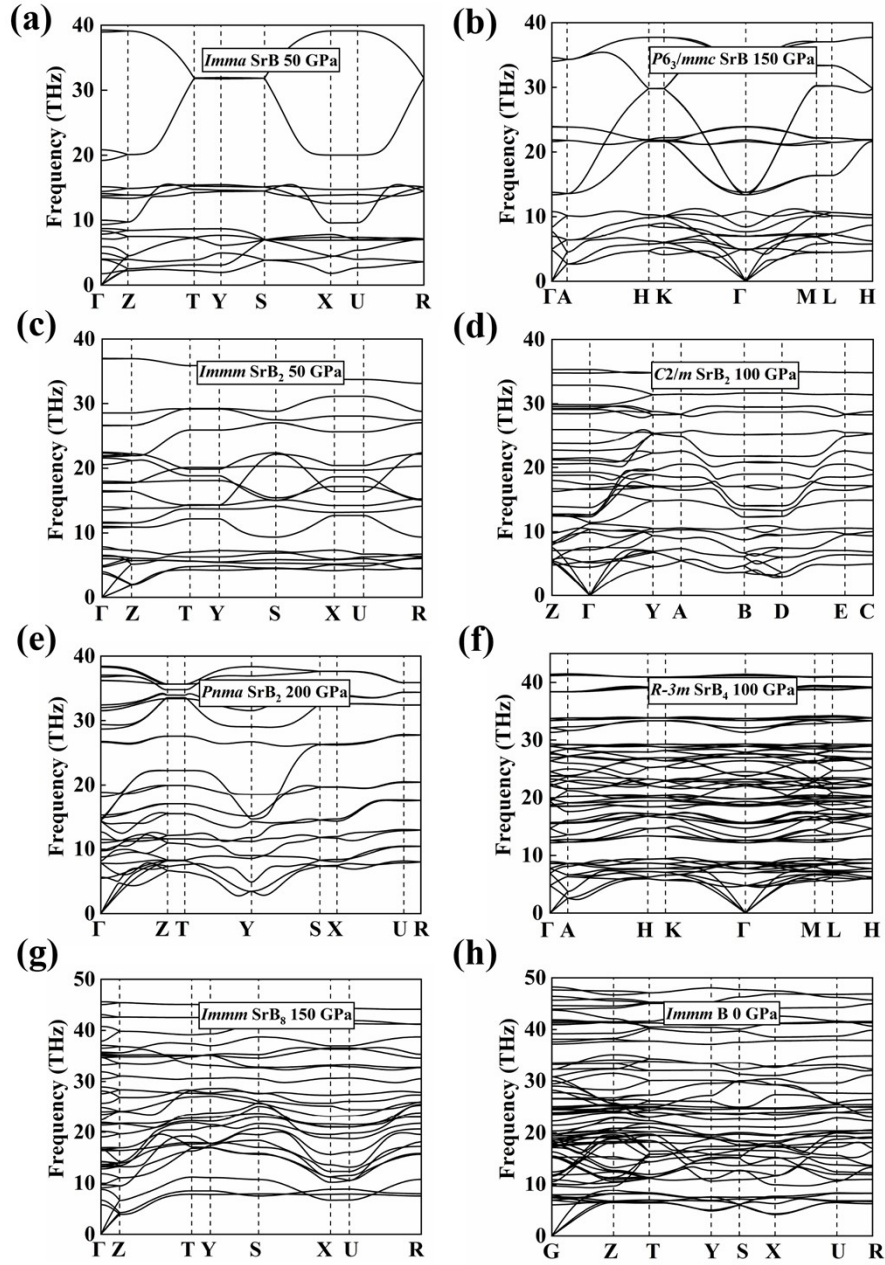

**Fig. S2.** Phonon dispersion curves of the predicted Sr-B compound, which are all dynamically stable in view of absence of imaginary frequency modes in the first Brillouin zone.

To understand the electronic properties of the Sr-B compound, we calculate the electronic band structures and the projected density of states (PDOS) of the stable phases. In  $R-3m$  SrB<sub>4</sub>, there appears to be a large overlap between the Sr-4*d*; Sr-5*p*; B-2*s*; and B-2*p* states below the Fermi level (Fig. S4f), suggesting there occurs charge transfer from Sr to B, in agreement with ELF (Fig. S5f).  $R-3m$  SrB<sub>4</sub> is an indirect semiconductor with a bandgap of 1.18 eV. Interestingly, all stable compounds except SrB<sub>4</sub> are metal, as shown in Figure S3. For the  $Imma$  SrB, PDOS analysis shows that Sr-4*d* and B-2*p* orbitals have a major contribution to the Fermi level and have significant hybridization between the Sr-4*d*; Sr-5*p*; and B-2*p* orbitals (Fig. S4a), which is similar to the orbital hybridization in  $Cmmm$  and  $I4/mmm$  SrB<sub>6</sub>. The PDOS of other Sr-B structures can reach the same conclusion (Fig. S4). The electron localization function is shown in Fig S5. The Sr-B bond is ionic, and the B–B bond is covalent.

Given the possible superconductivity of metallic compounds, we explore the superconductivity of the metallic phase of the Sr-B system by using the Macmillan-Allen-Deans formulation of  $\mu^* = 0.1$ . Table S1 lists some relevant features and  $T_c$  under high pressure. Among them,  $Imma$  SrB (structure at 50 GPa, Table S2) shows superconducting with  $T_c=8.1$  K, whereas  $Immm$  SrB<sub>8</sub> (structure at 150 GPa, Table S2) has the lowest ( $T_c = 0.2$  K). We also use the  $Imma$ -SrB structure to explore the variation of  $T_c$  with pressure, as shown in Table S1. For  $Imma$ -SrB, as the pressure increases,  $\omega_{log}(K)$  and  $N(E_f)$  increase, but the  $\lambda$  value decreases. The corresponding  $T_c$  was also reduced from 8.1 K (50 GPa) to 7.4 K (100 GPa).

**Table S1.** Superconducting properties of the metallic Sr-B phases.

| phases                   | Pressure<br>(GPa) | $T_c(K)$<br>$\mu^*=0.1$ | $N(E_f)$<br>(states/Ry) | $\lambda$ | $\omega_{log}(K)$ |
|--------------------------|-------------------|-------------------------|-------------------------|-----------|-------------------|
| $Imma$ -SrB              | 50                | 8.1                     | 9.52                    | 0.70      | 230.79            |
| $Imma$ -SrB              | 100               | 7.4                     | 7.99                    | 0.62      | 286.91            |
| $P6_3/mmc$ -<br>SrB      | 150               | 3.8                     | 17.95                   | 0.45      | 463.11            |
| $Immm$ -SrB <sub>2</sub> | 50                | 3.8                     | 8.80                    | 0.46      | 450.78            |
| $C2/m$ -SrB <sub>2</sub> | 100               | 0.5                     | 7.02                    | 0.32      | 592.88            |
| $Pnma$ -SrB <sub>2</sub> | 200               | 0.2                     | 9.68                    | 0.28      | 653.40            |
| $Immm$ -SrB <sub>8</sub> | 150               | 0.2                     | 4.30                    | 0.28      | 783.37            |
| $o$ -B <sub>16</sub>     | 0                 | 14.2                    | 8.29                    | 0.62      | 577.11            |



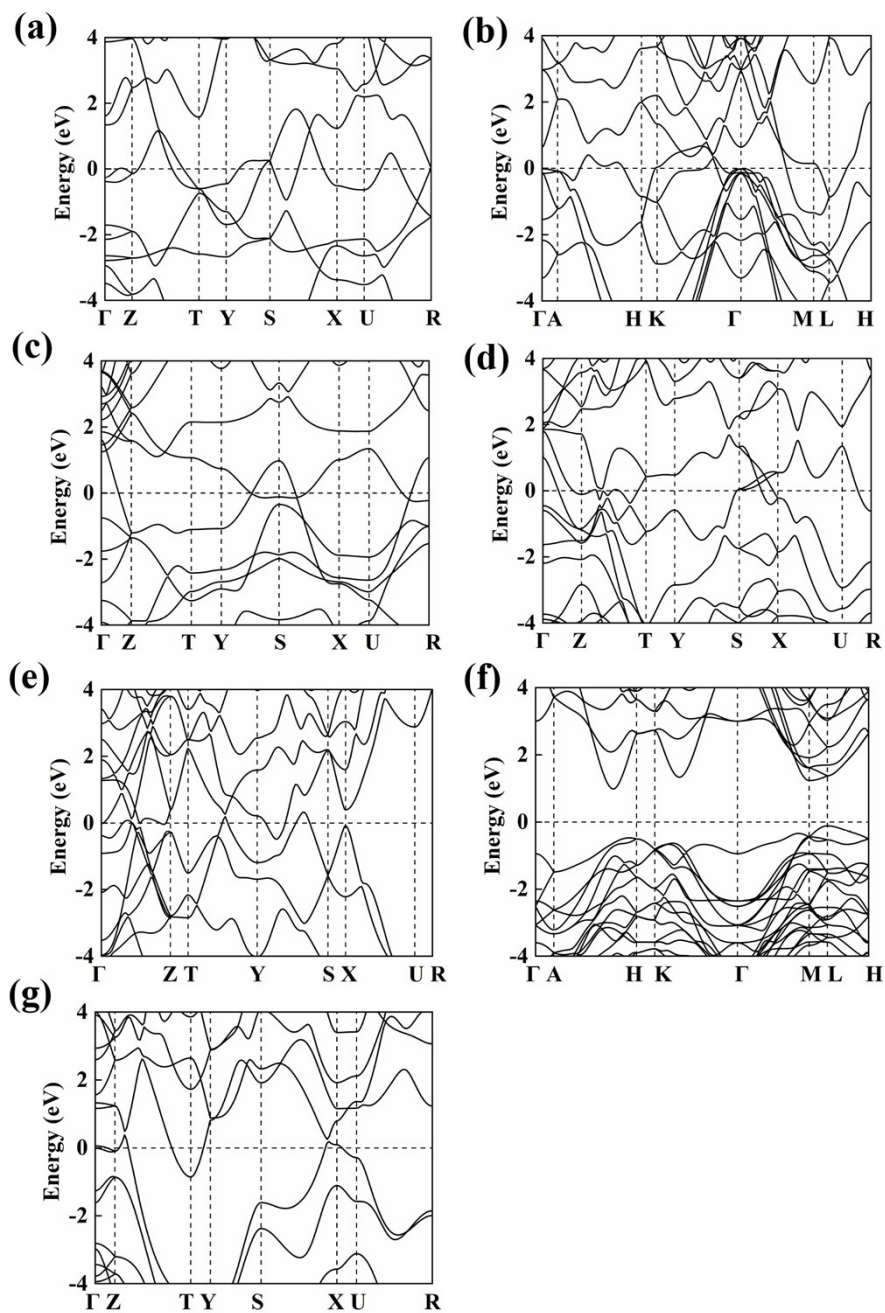

**Fig. S3.** The electronic band structures of the predicted Sr-B compounds. (a) *Imma* SrB at 50 GPa. (b) *P6<sub>3</sub>/mmc* SrB at 150 GPa. (c) *Immm* SrB<sub>2</sub> at 50 GPa. (d) *C2/m* SrB<sub>2</sub> at 100 GPa. (e) *Pnma* SrB<sub>2</sub> at 200 GPa. (f) *R-3m* SrB<sub>4</sub> at 100 GPa. (g) *Immm* SrB<sub>8</sub> at 150 GPa.

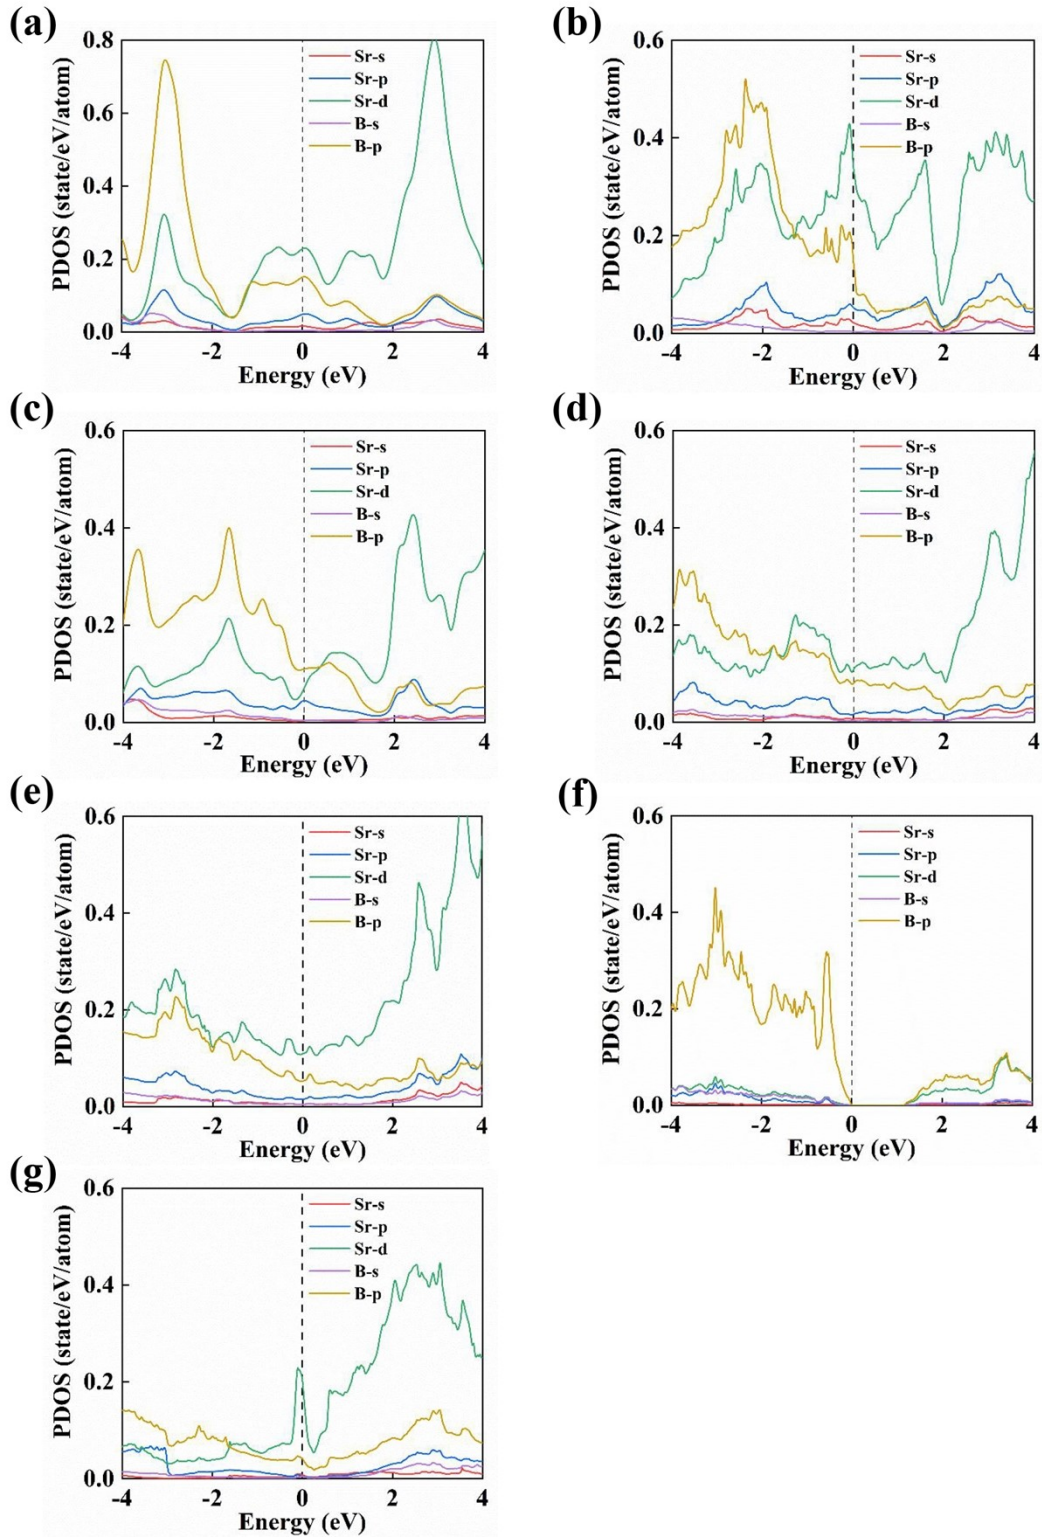

**Fig. S4.** The projected density of states (PDOS) of the predicted Sr-B compounds. (a) *Imma* SrB at 50 GPa. (b) *P6<sub>3</sub>/mmc* SrB at 150 GPa. (c) *Immm* SrB<sub>2</sub> at 50 GPa. (d) *C2/m* SrB<sub>2</sub> at 100 GPa. (e) *Pnma* SrB<sub>2</sub> at 200 GPa. (f) *R-3m* SrB<sub>4</sub> at 100 GPa. (g) *Immm* SrB<sub>8</sub> at 150 GPa.

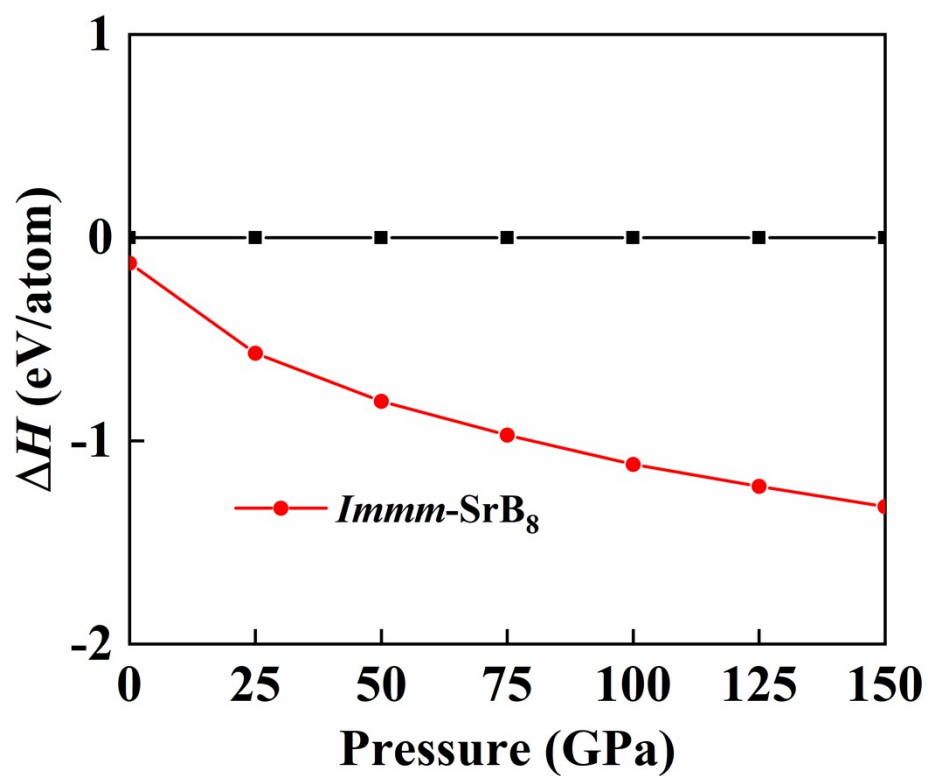

**Fig. S5.** The formation enthalpy per atom of *Immm*-SrB<sub>8</sub> compounds with respect to Sr and *o*-B<sub>16</sub> as functions of pressure.

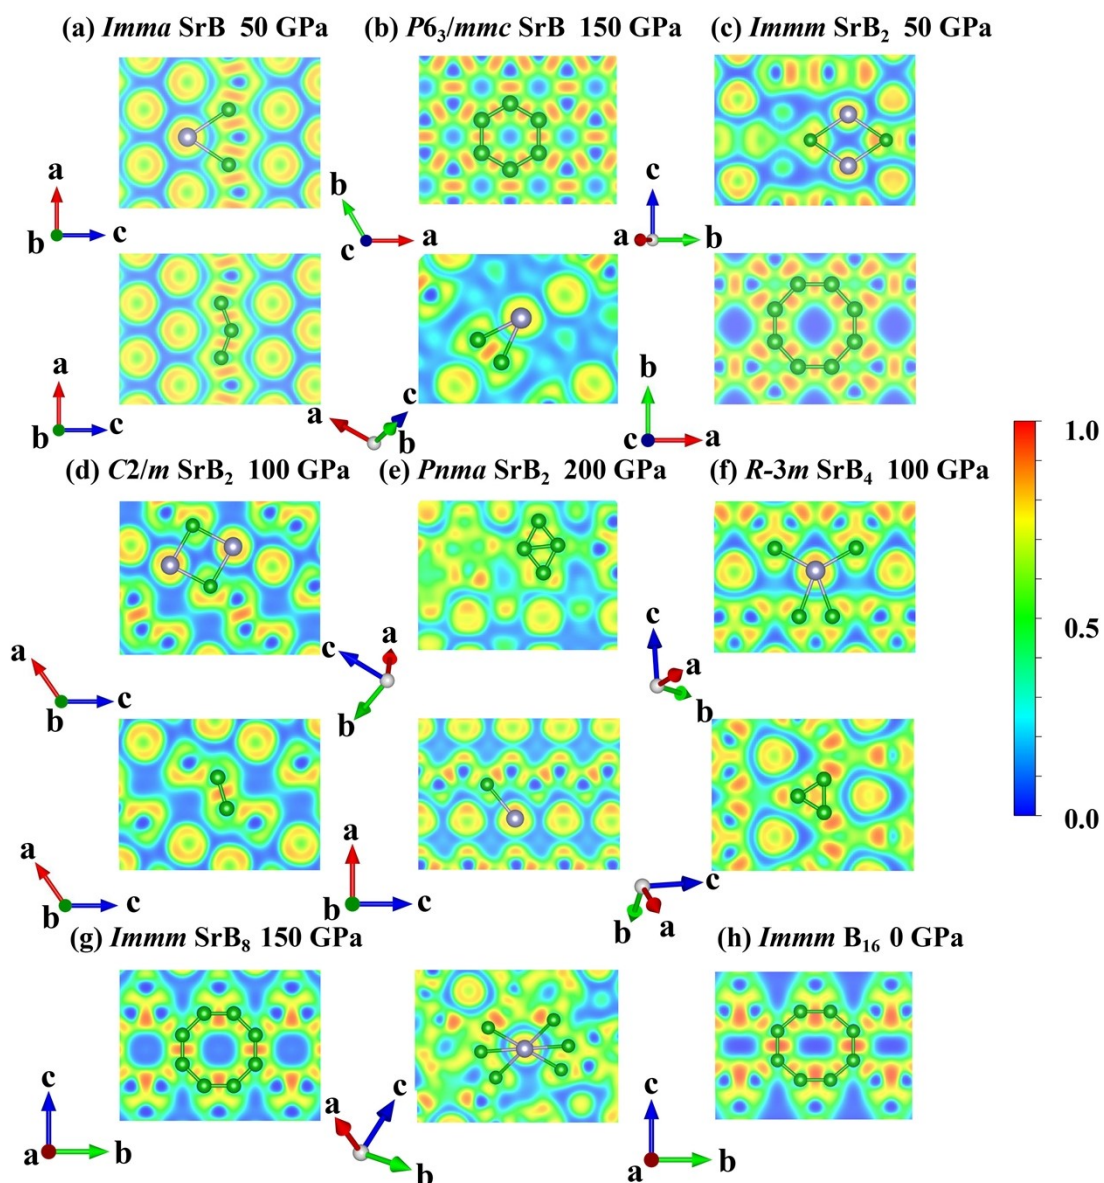

**Fig. S6.** Electron localization function (ELF) of the predicted stable Sr-B compounds. The ELF analysis can be used to distinguish different types of chemical bonds. Generally, the covalent bonds, lone electron pairs, and core electrons are characterized by large values ( $> 0.6$ ).

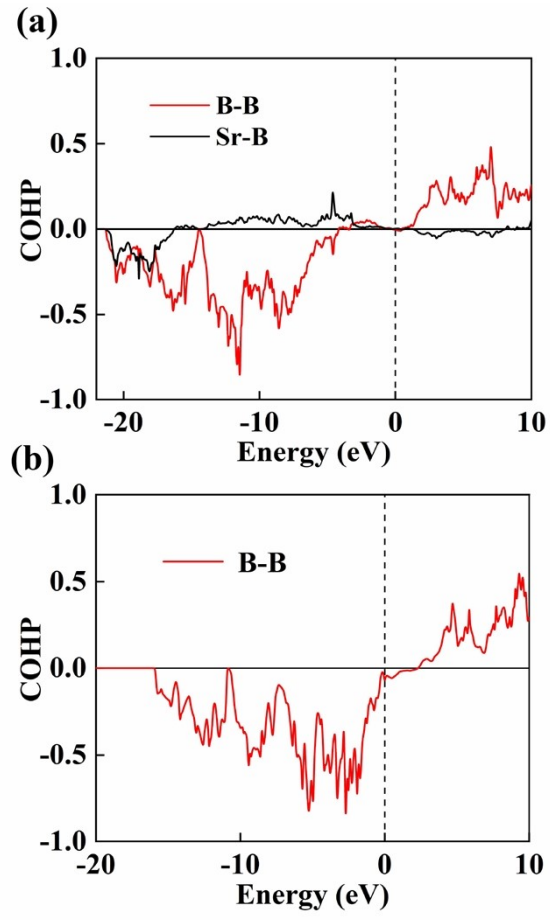

**Fig. S7.** (a) COHP for *Immm* SrB<sub>8</sub> at 150 GPa. (b) COHP for *Immm* B<sub>16</sub> at 0 GPa.

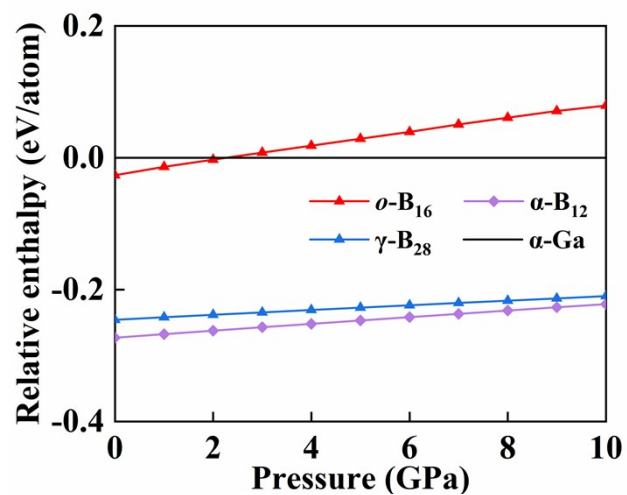

**Fig. S8.** The relative enthalpy per atom as a function of pressure within PBE calculations at  $T = 0$  K for the considered boron allotropes.

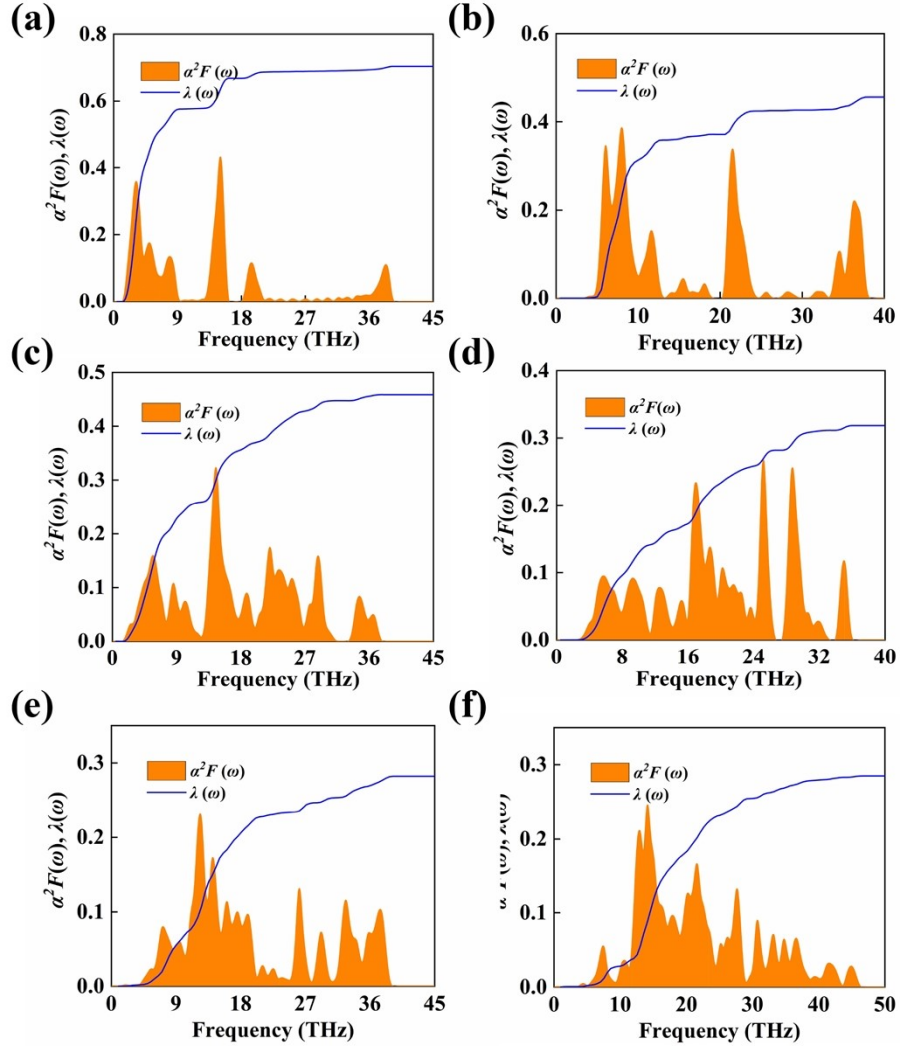

**Fig. S9.** Eliashberg spectral function  $\alpha^2 F(\omega)$  (orange area) and frequency-dependent electron-phonon coupling parameters  $\lambda(\omega)$  (blue line) of Sr-B compounds. (a) *Imma* SrB at 50 GPa. (b) *P6<sub>3</sub>/mmc* SrB at 150 GPa. (c) *Immm* SrB<sub>2</sub> at 50 GPa. (d) *C2/m* SrB<sub>2</sub> at 100 GPa. (e) *Pnma* SrB<sub>2</sub> at 200 GPa (f) *Immm* SrB<sub>8</sub> at 150 GPa.

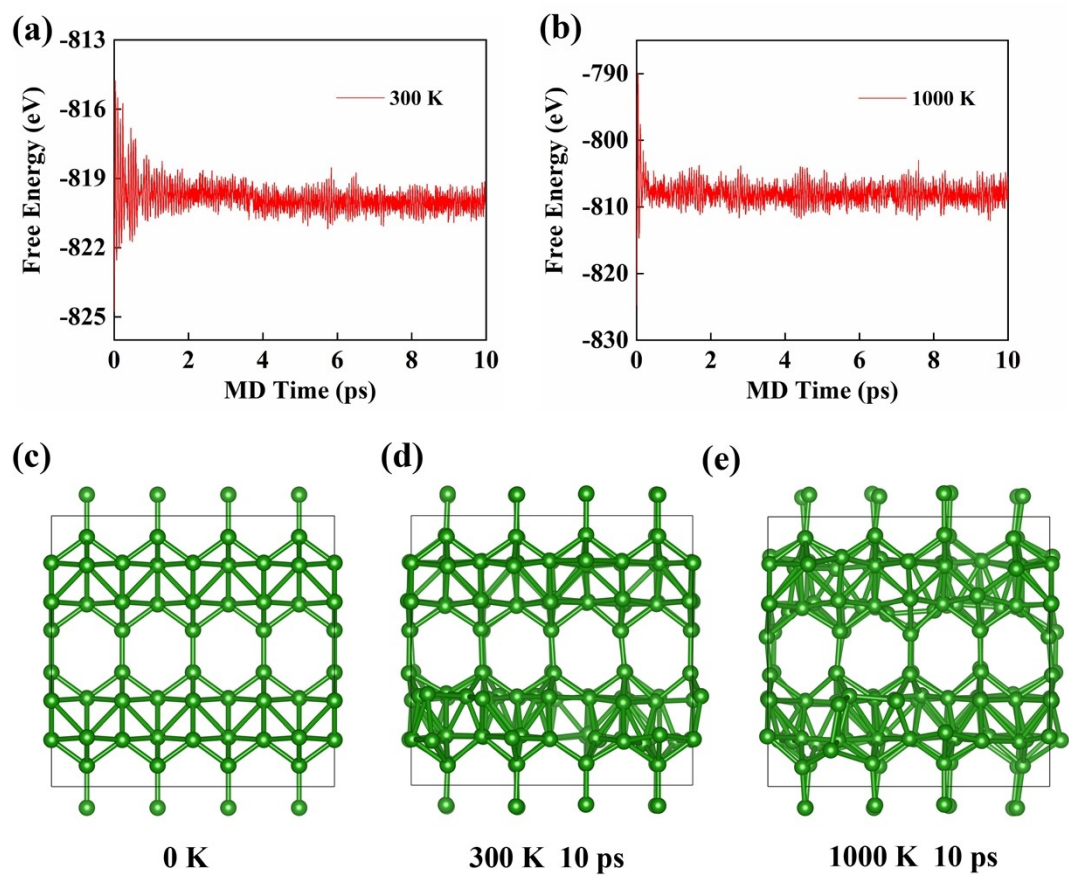

**Fig. S10.** Free energy as a function of time at the temperatures of 300 and 1000 K for  $o\text{-B}_{16}$  (a, b). Initiating structure (c). Snapshots after equilibration of  $o\text{-B}_{16}$  at 10 ps (d, e).



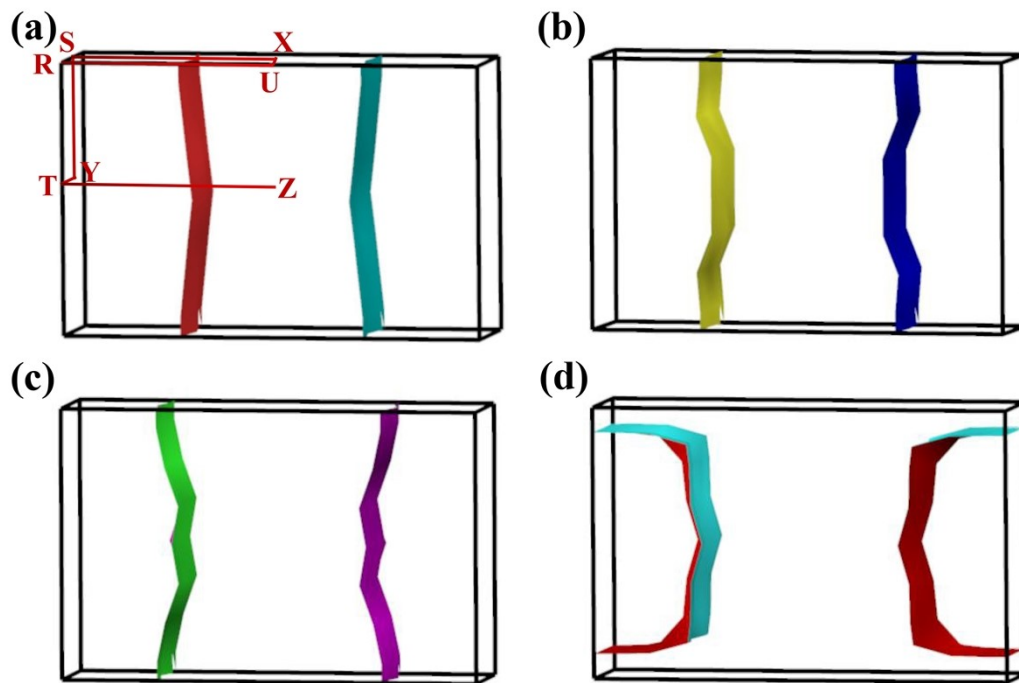

**Fig. S11.** The  $o$ -B<sub>16</sub> fermi surface associated with each band crossing the Fermi level.

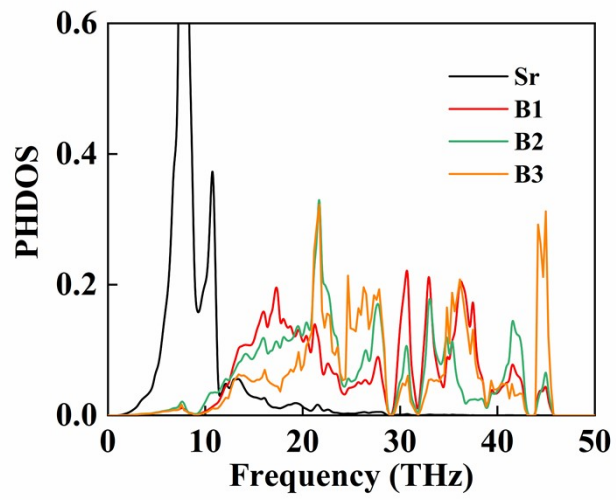

**Fig. S12.** Phonon density of states (PHDOS) of *Immm* SrB<sub>8</sub>.

**Table S2.** Structural information for the predicted stable Sr-B phases.

| Phases                        | Pressure<br>(GPa) | Lattice<br>Parameters<br>(Å, °) | Atoms   | Wyckoff Positions<br>(fractional) |          |         |
|-------------------------------|-------------------|---------------------------------|---------|-----------------------------------|----------|---------|
|                               |                   |                                 |         | x                                 | y        | z       |
| <i>Imma</i> SrB               | 50                | $a = 2.9761$                    | Sr(4e)  | 0.00000                           | 0.75000  | 0.08993 |
|                               |                   | $b = 4.5341$                    | B(4e)   | 0.50000                           | 1.25000  | 0.21283 |
|                               |                   | $c = 7.3510$                    |         |                                   |          |         |
|                               |                   | $\alpha = 90.0000$              |         |                                   |          |         |
|                               |                   | $\beta = 90.0000$               |         |                                   |          |         |
| <i>P6<sub>3</sub>/mmc</i> SrB | 150               | $a = 2.7595$                    | Sr (4f) | 0.66667                           | 0.33333  | 0.90895 |
|                               |                   | $b = 2.7595$                    | B(2b)   | 0.00000                           | 0.00000  | 0.25000 |
|                               |                   | $c = 11.0988$                   | B(2d)   | 0.33333                           | 0.66667  | 0.75000 |
|                               |                   | $\alpha = 90.0000$              |         |                                   |          |         |
|                               |                   | $\beta = 90.0000$               |         |                                   |          |         |
| <i>Immm</i> SrB <sub>2</sub>  | 50                | $a = 7.8485$                    | Sr (4e) | -0.19037                          | 0.00000  | 0.00000 |
|                               |                   | $b = 3.9441$                    | B(4j)   | 0.00000                           | -0.50000 | 0.19648 |
|                               |                   | $c = 4.0766$                    | B(4h)   | 0.00000                           | -0.21125 | 0.50000 |
|                               |                   | $\alpha = 90.0000$              |         |                                   |          |         |
|                               |                   | $\beta = 90.0000$               |         |                                   |          |         |
| <i>C2/m</i> SrB <sub>2</sub>  | 100               | $a = 7.7259$                    | Sr(4i)  | 0.92040                           | 0.50000  | 0.13560 |
|                               |                   | $b = 2.8307$                    | B(4i)   | 0.87401                           | 0.00000  | 0.44329 |
|                               |                   | $c = 5.7547$                    | B(4i)   | 0.23955                           | 0.00000  | 0.38560 |
|                               |                   | $\alpha = 90.0000$              |         |                                   |          |         |
|                               |                   | $\beta = 124.8714$              |         |                                   |          |         |
| <i>Pnma</i> SrB <sub>2</sub>  | 200               | $a = 10.9493$                   | Sr(4c)  | -0.31999                          | 0.75000  | 0.77495 |
|                               |                   | $b = 2.7396$                    | B(4c)   | 0.07317                           | 0.25000  | 0.19668 |
|                               |                   | $c = 2.8039$                    | B(4c)   | 0.00163                           | 0.25000  | 0.69452 |
|                               |                   | $\alpha = 90.0000$              |         |                                   |          |         |
|                               |                   | $\beta = 90.0000$               |         |                                   |          |         |
| <i>R-3m</i> SrB <sub>4</sub>  | 100               | $a = 4.2085$                    | Sr(6c)  | 0.00000                           | 0.00000  | 0.79171 |
|                               |                   | $b = 4.2085$                    | B(6c)   | 0.00000                           | 0.00000  | 0.56189 |
|                               |                   | $c = 14.2745$                   | B(18h)  | -0.39296                          | -0.19648 | 0.62204 |
|                               |                   | $\alpha = 90.0000$              |         |                                   |          |         |
|                               |                   | $\beta = 90.0000$               |         |                                   |          |         |
| <i>Immm</i> SrB <sub>8</sub>  | 150               | $a = 2.6147$                    | Sr(2d)  | 0.00000                           | 0.50000  | 0.00000 |
|                               |                   | $b = 3.90370$                   | B(4i)   | 0.00000                           | 0.00000  | 0.16735 |
|                               |                   | $c = 10.0127$                   | B(8l)   | 0.00000                           | 0.20288  | 0.30739 |

|                                |   |                    |       |         |         |         |
|--------------------------------|---|--------------------|-------|---------|---------|---------|
| <b><i>o</i>-B<sub>16</sub></b> | 0 | $\alpha = 90.0000$ | B(4j) | 0.50000 | 0.00000 | 0.92209 |
|                                |   | $\beta = 90.0000$  |       |         |         |         |
|                                |   | $\gamma = 90.0000$ |       |         |         |         |
|                                |   | $a = 2.8026$       | B(4i) | 0.00000 | 0.00000 | 0.17331 |
|                                |   | $b = 4.3365$       | B(8l) | 0.00000 | 0.19774 | 0.31764 |
|                                |   | $c = 10.71920$     | B(4j) | 0.50000 | 0.00000 | 0.92191 |
|                                |   | $\alpha = 90.000$  |       |         |         |         |
| $\beta = 90.000$               |   |                    |       |         |         |         |
|                                |   | $\gamma = 90.000$  |       |         |         |         |

**Table S3.** Elastic stiffness constants  $C_{ij}$ .

|                           | $C_{11}$ | $C_{22}$ | $C_{33}$ | $C_{44}$ | $C_{55}$ | $C_{66}$ | $C_{12}$ | $C_{13}$ | $C_{23}$ |
|---------------------------|----------|----------|----------|----------|----------|----------|----------|----------|----------|
| <i>o</i> -B <sub>16</sub> | 460.07   | 536.28   | 483.15   | 124.22   | 109.85   | 61.35    | 16.80    | 25.82    | 97.58    |

The criteria for mechanical stability are given by:

$$C_{11} > 0, C_{22} > 0, C_{33} > 0, C_{44} > 0, C_{55} > 0, C_{66} > 0,$$

$$[C_{11} + C_{22} + C_{33} + 2(C_{12} + C_{13} + C_{23})] > 0,$$

$$(C_{11} + C_{22} - 2C_{12}) > 0,$$

$$(C_{11} + C_{33} - 2C_{13}) > 0,$$

$$(C_{22} + C_{33} - 2C_{23}) > 0.$$

**Table S4.** Bader atomic charge of the predicted stable Sr-B phases.

| Phases                       | Pressur    |       |            |
|------------------------------|------------|-------|------------|
|                              | e<br>(GPa) | Atoms | Charge (e) |
| <i>Immm</i> SrB <sub>8</sub> | 150        | Sr1   | 1.03       |
|                              |            | B1    | -0.22      |
|                              |            | B2    | -0.08      |
|                              |            | B3    | -0.09      |

**Table S5.** Total energy of *o*-B<sub>16</sub>,  $\alpha$ -B<sub>12</sub>,  $\gamma$ -B<sub>28</sub>, and  $\alpha$ -Ga-type boron.

| Phases                    | Pressur    |                     |
|---------------------------|------------|---------------------|
|                           | e<br>(GPa) | Energy<br>(eV/atom) |
| $\gamma$ -B <sub>28</sub> | 0 GPa      | -6.6526             |
| $\alpha$ -B <sub>12</sub> | 0 GPa      | -6.6798             |
| $\alpha$ -Ga-type         | 0 GPa      | -6.4070             |
| <i>o</i> -B <sub>16</sub> | 0 GPa      | -6.4332             |

## References

1. Y. Wang, J. Lv, L. Zhu and Y. Ma, *Phys. Rev. B*, 2010, **82**, 094116.
2. Y. Wang, J. Lv, L. Zhu and Y. Ma, *Comput. Phys. Commun.*, 2012, **183**, 2063-2070.
3. G. Kresse and J. Furthmüller, *Phys. Rev. B*, 1996, **54**, 11169-11186.
4. P. Blaha, K. Schwarz, P. Sorantin and S. B. Trickey, *Comput. Phys. Commun.*, 1990, **59**, 399-415.
5. P. Giannozzi, S. Baroni, N. Bonini, M. Calandra, R. Car, C. Cavazzoni, D. Ceresoli, G. L. Chiarotti, M. Cococcioni, I. Dabo, A. Dal Corso, S. de Gironcoli, S. Fabris, G. Fratesi, R. Gebauer, U. Gerstmann, C. Gougoussis, A. Kokalj, M. Lazzeri, L. Martin-Samos, N. Marzari, F. Mauri, R. Mazzarello, S. Paolini, A. Pasquarello, L. Paulatto, C. Sbraccia, S. Scandolo, G. Sclauzero, A. P. Seitsonen, A. Smogunov, P. Umari and R. M. Wentzcovitch, *J. Phys: Condens. Mat.*, 2009, **21**, 395502.
6. L. N. Oliveira, E. K. U. Gross and W. Kohn, *Phys. Rev. Lett.*, 1988, **60**, 2430-2433.
7. M. Lüders, M. A. L. Marques, N. N. Lathiotakis, A. Floris, G. Profeta, L. Fast, A. Continenza, S. Massidda and E. K. U. Gross, *Phys. Rev. B*, 2005, **72**, 024545.
8. P. B. Allen and R. C. Dynes, *Phys. Rev. B*, 1975, **12**, 905-922.
9. J. P. Carbotte, *Rev. Mod. Phys.*, 1990, **62**, 1027-1157.
